# Supplementary material for: Predicting Outcome of Community-Based Early Intensive Behavioral Intervention for Children with Autism
Source: Springer Nature journal article supplement (doi:10.1007/s10802-015-0002-2), 2015-03-16
Supplement: MOESM1 [file 542778]

Supplemental electronic materials for MSJACP-D-14-00288

**Reliability on predictor measures based on behavior observation**

To establish reliability, we obtained training materials and a calibration video from the researcher who adapted the Early Social Communication Scales (ESCS) for use with children with ASD (Mundy). In addition, with written permission from families, we sent videos of pilot participants to the developers of the Social Orienting Scale (Dawson) and Motor Imitation Scale (Stone) until they indicated that the first author administered the scales with fidelity and scored accurately. We also expanded the coding criteria developed by the authors of the Ritvo-Freeman Real-Life Rating Scale. Before a research assistant administered any of these instruments or coded any research records, he/she was required to achieve >80% exact agreement with the first author in scoring the ESCS and Ritvo-Freeman and >90% exact agreement in scoring the Social Orienting and Motor Imitation Scales. We further required that research assistants maintain these levels of reliability in checks performed by the first author for every fifth video. If a research assistant fell below acceptable levels of reliability, he or she was re-trained.

**Correlations between age and domain scores at intake**

Age at intake was related to several outcomes so its association with intake assessments of MSEL and VABS are of interest. It will be recalled that MSEL and VABS sample-based *z* scores were not adjusted for age so that, other things being equal, older children would be expected to score higher on both scales. For this reason we used CA as a covariate in statistical analyses. In fact, as expected, age at intake was correlated with higher intake scores of MSEL and VABS, *r* = .61, *p* < .001, and .61, *p* < .001, respectively.

It is also of interest to consider correlations between domain scores and MSEL and VABS at intake. The Social Engagement domain was correlated .73, *p* < .001, and .70, *p* < .001, respectively, with intake MSEL and VABS. In contrast, the Sensorimotor Rituals domain was correlated far lower with intake scores of MSEL and VABS, respectively: -.26, *p* < .05, and -.39, *p* < .001. Thus, Social Engagement was associated with initial strengths on MSEL and VABS and, as shown in the paper and Fig. A1, with improvements on these scales over time. These results suggest that children with ASD who present with more social and communication skills also score higher on tests of IQ and competence.

In addition, younger age at intake tended to be related to more hours of treatment, *r*= -.25, *p* < .10. This trend has a complicated interpretation because, as noted in the text, hours of treatment reflect not only clinical need, but also availability of local resources and advocacy factors. In addition, age at intake is difficult to interpret as it may not reflect initial treatment in the case of children who received previous interventions. However, on the whole, there is a weak tendency for younger children to have received more intense EIBI.

In summary, older children at intake scored higher of age-unadjusted scores of IQ and social competence. In addition, greater social engagement strengths at intake were stronger correlates of contemporaneous MSEL and VABS scores than low sensorimotor rituals.

**Changes in Mullen Scales of Early Learning scores for Communication and Visuomotor subscales**

This section examines in greater detail changes over assessments in Mullen Scales of Early Learning (MSEL). We conducted an exploratory analysis assessing whether these changes differed for subtests reflecting communication (Receptive Language and Expressive Language) as opposed to visuomotor (Fine Motor and Visual Reception) skills. For this purpose, we averaged the sample-based *z* scores for the two Communication and the two Visuomotor subtests, respectively.

As expected and shown in Table A1, at each of the three assessments Communication and Visuomotor scores were highly and significantly correlated. This finding supports the homogeneity of the subtests making up our average MSEL score and our main analyses based on this measure. Admittedly, this homogeneity is probably influenced not only by the abilities measured by MSEL subtests but also by joint attention deficits interfering with test performance on all subtests.

Table A2 displays means over assessments for Communication and Visuomotor scores. In general, changes over assessments were somewhat more pronounced for the Visuomotor subscale, although there was also improvement for the Communication subscale. Specifically, the overall patterns of the two subscales over time did not differ significantly, *F*(2,203) = 1.62, n.s., ηp2=.03, but there was a trend for greater increment in Visuomotor than Communication scores from intake to Year 2, *F*(1,922) = 3.70, *p* = .06, ηp2 = .06.

Similar findings emerged from separate examinations of changes over time in the two subscales. Thus, improvement from the intake to Year 1 was marginal for Communication scores, *F*(1,9) = 4.19, *p* < .07, ηp2 = .16, and significant for Visuomotor scores, *F*(1,9) = 7.25, *p* < .03, ηp2 = .24. Similarly, the growth in MSEL scores from intake to Year 2 was somewhat less pronounced for Communication, *F*(1, 8) = 5.91, *p* < .04, ηp2 = .23, than Visuomotor scores, *F*(1, 11) = 10.51, *p* < .01, ηp2 = .28. Lastly, the growth from Year 1 to Year 2 was again smaller for Communication, *F*(1,38) = 4.12, *p* < .05, ηp2 = .09, than Visuomotor scores, *F*(1,61) = 6.64, *p* < .02, ηp2 = .12.

In summary, the results for changes over time in MSEL average scores were found for both subscales and were moderately more pronounced for Visuomotor subtests. Neither the Communication nor the Visuomotor subscales can be described as driving the findings for the MSEL average.

**Predictive ability of individual Social Engagement Scales**

The Social Engagement (SE) domain score predicted improved Mullen and Vineland scores at both follow-ups. It was of interest to gauge differences in this association among the eight scales making up the SE composite. The scales are highly intercorrelated, as shown in Table 3 and consistent with the results of the factor analysis described in the text. Therefore, it would not be appropriate to enter all scales simultaneously in a multiple regression predicting outcome because the overlap among individual predictors prevents them from making unique contributions to the prediction of a given outcome and the associated partial correlations would be reduced (Cohen, Cohen, West, & Aiken, 2003). Among the solutions recommended by Cohen et al. for this situation is to create a composite variable, the approach followed in the paper.

In an effort to evaluate the contribution of each SE scale, we carried out separate MRs in which the previously enumerated covariates (See Tables 3 and 4) were entered in the first step. In the second step we entered the SE scale under evaluation and the Sensorimotor Rituals domain. We performed this analysis for each SE scale in MRs for the two outcomes predicted by the SE composite (MSEL and VABS) at each of the two outcome assessments (Year 1 and Year 2). These MRs should be viewed as exploratory because (1) they were not planned and were inspired by the findings for the SE composite score; (2) some statistically significant probability values are likely to be false positives because of the large number of tests (8 scales x 2 outcomes x 2 assessments); and (3) the association of each scale with an outcome is not independent of its overlap with the other SE variables. In an attempt to deal with the problem of false positives, we used a Bonferroni adjustment of probabilities for each outcome, such that a family-adjusted alpha of .05 requires a nominal probability of .006.

Table A4 displays the partial correlations between each SE predictor and MSEL and VABS scores for both assessments; the table presents *unadjusted* probability levels for each partial correlation. Notably, all correlations are positive, consistent with the expectation that all SE predictors were associated with favorable outcomes. However, the extent of these associations shows considerable range. MSEL outcomes at both assessments were related to higher initial imitation and, most strongly, to observations of Initiating Behavior Bequests, Response to Joint Attention, and Social Orienting. In general, these observational measures were more strongly related to outcome than were parent ratings (Early Communicative Gestures and Active-but-Odd social approach). Also, the extent of these associations was stronger for Year 1 than Year 2 MSEL outcomes. In fact, only one partial correlation for Year 2 reached Bonferroni-adjusted levels of significance. Somewhat surprisingly, Initiating Joint Attention was not strongly correlated with outcome, contrary to findings from longitudinal studies of untreated children with ASD (Sigman & Ruskin, 1999).

Associations between individual SE scales and Vineland outcomes were considerably weaker than those for the MSEL and were largely limited to Year 1. In fact, none of the partial correlations reached significance. The predictors with relatively strongest partial correlations with Vineland Year 1 results were measures of observations of Motor Imitation, Initiating Behavior Requests, and Response to Joint Attention, as well as parent-reported Early Communicative Gestures. All these associations appeared to be of similar strength. These results seem to suggest that parents’ observations at the onset of treatment most sensitively, albeit weakly, predict their judgments of adaptive behavior after one year of ABA.

Overall, as might be expected, individual SE variables predicted MSEL and VSAB outcomes far less strongly than the composite SE domain. Clearly, the SE domain possesses superior statistical properties and spans a larger range of social-affective behaviors than its individual components. Within these constraints parental and observed measures of imitation as well as observations of joint attention were associated with superior MSEL standing at the Year 1 assessment. Far weaker associations with VABS outcome at the Year 1 evaluation were found for parent reports and observed imitation, some observations of joint attention, and parent reports of early nonverbal communication. Overall, as was the case for the composite SE scores, infants with ASD who presented with relatively stronger social engagement behaviors had better outcomes at Year 1.

**Figures**

As described in the text, chronological age and MSEL scores at intake were two covariates with strong associations with outcomes. The top panel in Fig. A1 illustrates the finding that, relative to their older peers, younger children exhibited larger increases in MSEL and VABS scores at both assessments. The bottom panel illustrates the greater increments over assessments in both MSEL and VABS for children with higher MSEL scores at intake.

In turn, Fig. A2 depicts the relationships at each follow-up of MSEL and VABS change and the Sensorimotor Rituals (top) and Social Engagement domains (bottom). The figure illustrates minimal relationship between changes in MSEL and VABS as a function of the Sensorimotor Rituals Domain. In contrast, the figure depicts greater increases in MSEL and VABS for children with high Social Engagement domain scores at entry into the study.

Reference

Cohen, J., Cohen, P., West, S. G., & Aiken, L. S. (2003). *Applied multiple regression/correlation analysis for the behavioral sciences.* Mahwah, NJ: Lawrence Erlbaum.

*Table A1*. Correlations between Communication and Visuomotor Mullen Subscales of Early Learning at each assessment

| Assessment | *r* |
| --- | --- |
| Intake | .85*** |
| Year 1 | .85*** |
| Year 2 | .92** |

†*p* < .10; **p* < .05; ***p* < .01; ****p* < .001

Note: Table entries are correlations pooled from five imputations.

*Table A2.* Mean (SD) scores over assessments for Communication and Visuomotor scales of the Mullen Scales of Early Learning

| Assessment | Communication | Visuomotor |
| --- | --- | --- |
| Intake | 0.00 (0.96) | 0.00 (0.96) |
| Year 1 | 0.81 (1.28) | 0.93 (1.18) |
| Year 2 | 1.23 (1.40) | 1.39 (1.43) |

Notes: Means (SDs) are based on sample *z* scores pooled over five imputations

*Table A3*.Correlations among individual Social Engagement variables

|  | MacArthur  Imitation | Motor  Imitation | Initiates Joint  Attention | Behavior  Regulation | Responds to Joint Attention | Social Orienting | Early Words and Gestures | Active but Odd |
| --- | --- | --- | --- | --- | --- | --- | --- | --- |
| MacArthur  Imitation | 1.00 | .580*** | .239* | .254* | .627*** | .395*** | .568 *** | .591 *** |
| Motor  Imitation |  | 1.00 | .501*** | .389*** | .761*** | .431*** | .475*** | .523*** |
| Initiating  Joint  Attention |  |  | 1.00 | .270* | .563*** | .443*** | .253* | .336** |
| Initiating Behavior Requests |  |  |  | 1.00 | .426 *** | .405*** | .225* | .118 |
| Response  to Joint Attention |  |  |  |  | 1.00 | .523*** | .537*** | .666*** |
| Social Orienting |  |  |  |  |  | 1.00 | .315** | .326** |
| Early Communicative Gestures |  |  |  | . |  |  | 1.00 | .530*** |
| Active but Odd |  |  |  |  |  |  |  | 1.000 |

†*p* < .10; **p* < .05; ***p* < .01; ****p* < .001

Notes: Correlations are pooled from five imputations. Social Orienting = Sum Observed Social Orienting; Early Words and Gestures = MacArthur Early Words and First Gestures.

*Table A4*.Partial correlations with outcomes for individual Social Engagement predictors adjusted for covariates and Sensorimotor Rituals

|  | Mullen Year1 | Vineland Year 1 | Mullen Year 2 | Vineland Year 2 |
| --- | --- | --- | --- | --- |
| MacArthur Imitation | .32* | .29† | .16 | .24 |
| Motor Imitation | .45*** | .28† | .36** | .14 |
| Initiates Joint Attention | .21 | .18 | .14 | .08 |
| Initiating Behavior Requests | .40*** | .23† | .33* | .19 |
| Responds to Joint Attention | .52*** | .29† | .41* | .39* |
| Sum Observed Social Orienting | .44*** | .19 | .31† | .21 |
| MacArthur Early Words  and First Gestures | .17 | .21† | .11 | .18 |
| Active but Odd | .09 | .17 | -.01 | .18 |

†*p* < .10; **p* < .05; ***p* < .005; ****p* < .001

Notes: Table entries are partial correlations pooled over five imputations between predictors and outcome variables at Year 1 and Year 2. Partial correlations are adjusted for covariates and Sensorimotor Rituals domain scores. Tabulated probability levels were not adjusted for familywise alpha.

Mullen = Mullen Scales of Early Learning; Vineland = Vineland Adaptive Behavior Scales

*Figure Captions*

*Figure A1*. Distribution of change from intake to Year 1 (left two panels) and to Year 2 (right two panels) for the average of Mullen (MSEL) and Vineland (VABS) scales as a function of age at intake (top) and MSEL at intake (bottom). The best fitting line relating the variables is also plotted. MSEL and VABS were scored as standard scores based on the mean and standard deviation at the intake.

*Figure A2.* Distribution of change from intake to Year 1 (left two panels) and to Year 2 (right two panels) for the average of Mullen and Vineland scales as a function of the Sensorimotor Rituals and Social Engagement domains obtained at intake. The best fitting line relating the variables is also plotted. All measures were scored as standard scores based on the mean and standard deviation at the intake.
